# Supplementary material for: Finding a mononuclear cobalt(iii)-peroxo complex with 1,4,7,10-tetraazacyclododecane, an intermediate for dioxygen reduction
Source: Royal Society of Chemistry journal article supplement (doi:10.1039/d3nj04108e), 2023-01-01
Supplement: d3nj04108e1.pdf [file d3nj04108e1.pdf]

## Finding a mononuclear cobalt(III)-peroxo complex with 1,4,7,10-tetraazacyclododecane, an intermediate for dioxygen reduction

Yan Zhang <sup>ab</sup>, Xiao-Fang Qi <sup>a</sup>, Can-Hao Li <sup>a</sup>, Shu-Zhong Zhan <sup>\*a</sup>

*a* Chemistry & Chemical Engineering, South China University of Technology, Guangzhou 510640, China

*b* City College of Dongguan University of Technology, Dongguan 523419, China

### Supplementary Materials

Table of context

|   |                                                                                                                                                                                                                                                                                                              |
|---|--------------------------------------------------------------------------------------------------------------------------------------------------------------------------------------------------------------------------------------------------------------------------------------------------------------|
| 1 | <b>Physical measurements</b>                                                                                                                                                                                                                                                                                 |
| 2 | <b>Determination for crystal structures of the cobalt complexes</b>                                                                                                                                                                                                                                          |
| 3 | <b>Fig. S1.</b> Powder X-ray diffraction of [Co(L)(Cl) <sub>2</sub> ]Cl <b>1</b> . As-synthesized (up); Simulated (down).                                                                                                                                                                                    |
| 4 | <b>Fig. S2.</b> ESI-MS of [Co(L)(Cl) <sub>2</sub> ]Cl <b>1</b> in CH <sub>3</sub> CN.                                                                                                                                                                                                                        |
| 5 | <b>Fig. S3.</b> (a) CV of 6.5 mM CoCl <sub>2</sub> in CH <sub>3</sub> CN. Conditions: 0.10 M [ <i>n</i> -Bu <sub>4</sub> N]ClO <sub>4</sub> as supporting electrolyte, scan rate: 100 mV/s, glassy carbon working electrode (1 mm diameter), Pt counter electrode, Ag/AgNO <sub>3</sub> reference electrode. |
| 6 | <b>Fig. S4.</b> CV of the ligand (6.5 mM) in CH <sub>3</sub> CN. Conditions: 0.10 M [ <i>n</i> -Bu <sub>4</sub> N]ClO <sub>4</sub> as supporting electrolyte, scan rate: 100 mV/s, glassy carbon working electrode (1 mm diameter), Pt counter electrode, Ag/AgNO <sub>3</sub> reference electrode.          |

|    |                                                                                                                                                                                                                                                                                                                                                                                |
|----|--------------------------------------------------------------------------------------------------------------------------------------------------------------------------------------------------------------------------------------------------------------------------------------------------------------------------------------------------------------------------------|
| 7  | <b>Fig. S5.</b> Infrared spectra of the reaction solution of $[\text{Co}(\text{L})(\text{Cl})_2]\text{Cl}$ <b>1</b> (0.10 mM) generated upon constant potential electrolysis experiment with $^{16}\text{O}_2$ or $^{18}\text{O}_2$ in acetonitrile-water under at -0.2 V.                                                                                                     |
| 8  | <b>Fig. S6.</b> UV-vis absorption spectrum of complex <b>1</b> (0.02 mM) in acetonitrile under -0.20 V with $\text{H}^+$ (1.0 mM) at room temperature.                                                                                                                                                                                                                         |
| 9  | <b>Fig. S7.</b> Infrared spectrum of $[\text{Co}(\text{L})(\mu\text{-OH})(\mu\text{-OO})\text{Co}(\text{L})]\text{Cl}_3$ <b>2</b> .                                                                                                                                                                                                                                            |
| 10 | <b>Fig. S8.</b> Raman spectrum of $[\text{Co}(\text{L})(\mu\text{-OH})(\mu\text{-OO})\text{Co}(\text{L})]\text{Cl}_3$ <b>2</b> .                                                                                                                                                                                                                                               |
| 11 | <b>Fig. S9.</b> Rotating ring-disk electrode (RRDE) measurement for $\text{O}_2$ reduction at the glassy carbon (GC) disk electrode loaded with $[\text{Co}(\text{L})(\text{Cl})_2]\text{Cl}$ <b>1</b> in an $\text{O}_2$ -saturated 0.1 M KOH solution at various rotation rates. Conditions: work electrode, GC disk electrode; counter electrode, Pt ring electrode, 25 °C. |
| 12 | <b>Fig. S10.</b> RRDE measurement for $\text{O}_2$ reduction of the ring current loaded with $[\text{Co}(\text{L})(\text{Cl})_2]\text{Cl}$ <b>1</b> in an $\text{O}_2$ -saturated 0.1 M KOH solution at various rotation rates. Conditions: work electrode, GC disk electrode; counter electrode, Pt ring electrode, 25 °C.                                                    |
| 13 | <b>Fig. S11.</b> RRDE measurement for $\text{O}_2$ reduction at the GC disk electrode loaded with $[\text{Co}(\text{L})(\text{Cl})_2]\text{Cl}$ <b>1</b> in an $\text{O}_2$ -saturated with 1600 rpm at various KOH concentrations. Conditions: work electrode, GC disk electrode; counter electrode, Pt ring electrode, 25 °C.                                                |
| 14 | <b>Fig. S12.</b> RRDE measurement for $\text{O}_2$ reduction of the ring current loaded with $[\text{Co}(\text{L})(\text{Cl})_2]\text{Cl}$ <b>1</b> in an $\text{O}_2$ -saturated with 1600 rpm at various KOH concentrations. Conditions: work electrode, GC disk electrode; counter electrode, Pt ring electrode, 25 °C.                                                     |
| 15 | <b>Fig. S13.</b> RRDE measurement for $\text{O}_2$ reduction at the GC disk electrode loaded with $[\text{Co}(\text{L})(\text{Cl})_2]\text{Cl}$ <b>1</b> in a $\text{N}_2$ -saturated and in an $\text{O}_2$ -saturated 0.1 M KOH solution with 1600 rpm. Conditions: work electrode, GC disk electrode; counter electrode, Pt ring electrode, 25 °C.                          |

|           |                                                                                                                                                                                                                                                                                                                                      |
|-----------|--------------------------------------------------------------------------------------------------------------------------------------------------------------------------------------------------------------------------------------------------------------------------------------------------------------------------------------|
| <b>16</b> | <b>Fig. S14.</b> RRDE measurement for O <sub>2</sub> reduction of the ring current loaded with [Co(L)(Cl) <sub>2</sub> ]Cl <b>1</b> in a N <sub>2</sub> -saturated and in an O <sub>2</sub> -saturated 0.1 M KOH solution with 1600 rpm. Conditions: work electrode, GC disk electrode; counter electrode, Pt ring electrode, 25 °C. |
| <b>17</b> | <b>Fig. S15.</b> The selectivity (%H <sub>2</sub> O <sub>2</sub> ) as a function of the disk potential with varying rotation rates, in 0.1 M KOH solution.                                                                                                                                                                           |
| <b>18</b> | <b>Fig. S16.</b> The selectivity (%H <sub>2</sub> O <sub>2</sub> ) as a function of the disk potential with different KOH concentrations at 1600 rpm.                                                                                                                                                                                |

### Physical measurements

A Perkin-Elmer analyzer model 240 was used to do elemental analyses for C, H, and N. A Hitachi U-3010 spectrophotometer was used to measure UV-vis spectra of the samples. IR spectra were obtained as KBr pellets on a Bruker 1600 FT-IR spectrometer from 4000 to 400 cm<sup>-1</sup>. Electron paramagnetic resonance (EPR) spectra of the cobalt complexes were taken on a Bruker Elexsys II E500 EPR spectrometer. Electrochemical measurements and analysis were conducted by using a CHI-660E electrochemical analyzer.

### Determination for crystal structures of the cobalt complexes

Measurement and analyses for the structures of the cobalt complexes were conducted on a Bruker Smart Apex II DUO area detector employing graphite monochromated Mo-K $\alpha$  radiation ( $\lambda = 0.71073 \text{ \AA}$ ). All empirical absorption corrections were conducted on the SADABS program. <sup>1</sup> Direct method was used to analyze the structures of the cobalt complexes and the corresponding non-hydrogen

atoms were refined with the XL refinement package.<sup>2</sup> All calculations were carried out on a ShelXS structure solution program.<sup>3</sup> Non-hydrogen atoms were refined anisotropically, while hydrogen atoms on carbon atoms were generated geometrically and refined isotropically.

1 G. M. Sheldrick, SADABS, Program for Empirical Absorption Correction of Area Detector Data, University of Göttingen, Göttingen, Germany, 1996.

2 O. V. Dolomanov, L. J. Bourhis, R. J. Gildea, J. A. K. Howard and H. Puschmann, OLEX2: a complete structure solution, refinement and analysis program. *J. Appl. Cryst.*, 2009, **42**, 339-341.

3 G. M. Sheldrick, Crystal structure refinement with SHELXL. *Acta Cryst.*, 2015, **C17**, 3-8.

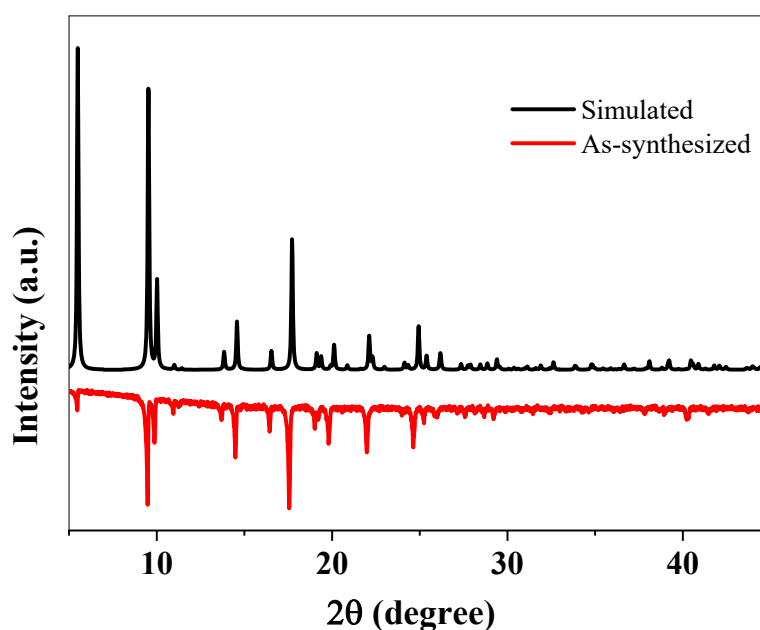

**Fig. S1.** Powder X-ray diffraction of  $[\text{Co}(\text{L})(\text{Cl})_2]\text{Cl}$  **1**. As-synthesized (up); Simulated (down).

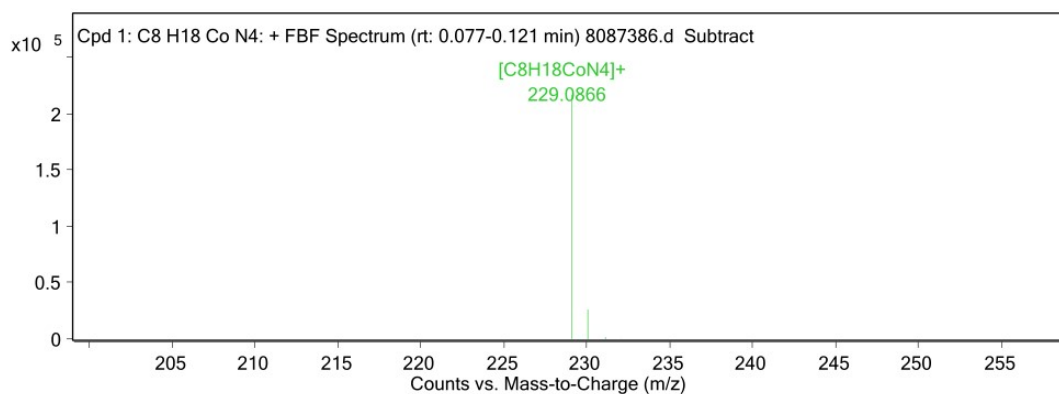

**Fig. S2.** ESI-MS of  $[\text{Co}(\text{L})(\text{Cl})_2]\text{Cl}$  **1** in  $\text{CH}_3\text{CN}$ .

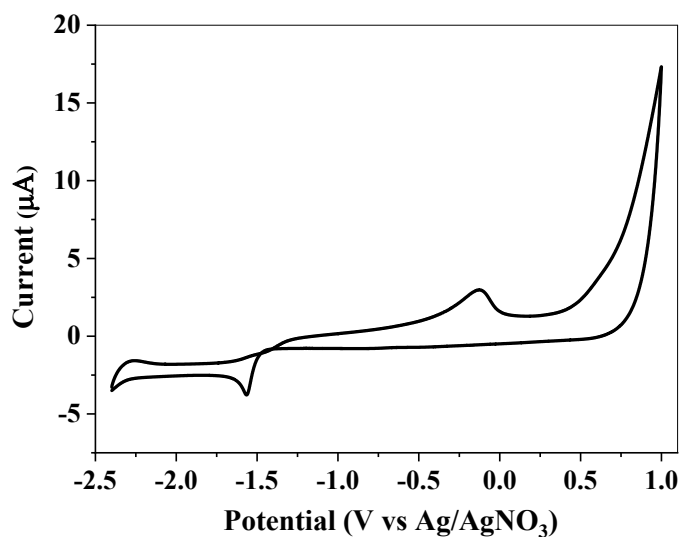

**Fig. S3.** (a) CV of 6.5 mM  $\text{CoCl}_2$  in  $\text{CH}_3\text{CN}$ . Conditions: 0.10 M  $[\text{n-Bu}_4\text{N}]\text{ClO}_4$  as supporting electrolyte, scan rate: 100 mV/s, glassy carbon working electrode (1 mm diameter), Pt counter electrode,  $\text{Ag}/\text{AgNO}_3$  reference electrode.

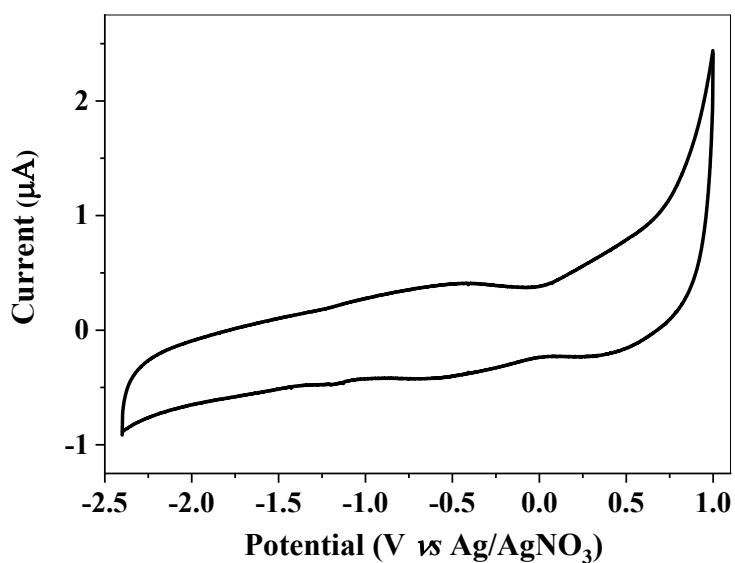

**Fig. S4.** CV of the ligand (6.5 mM) in CH<sub>3</sub>CN. Conditions: 0.10 M [*n*-Bu<sub>4</sub>N]ClO<sub>4</sub> as supporting electrolyte, scan rate: 100 mV/s, glassy carbon working electrode (1 mm diameter), Pt counter electrode, Ag/AgNO<sub>3</sub> reference electrode.

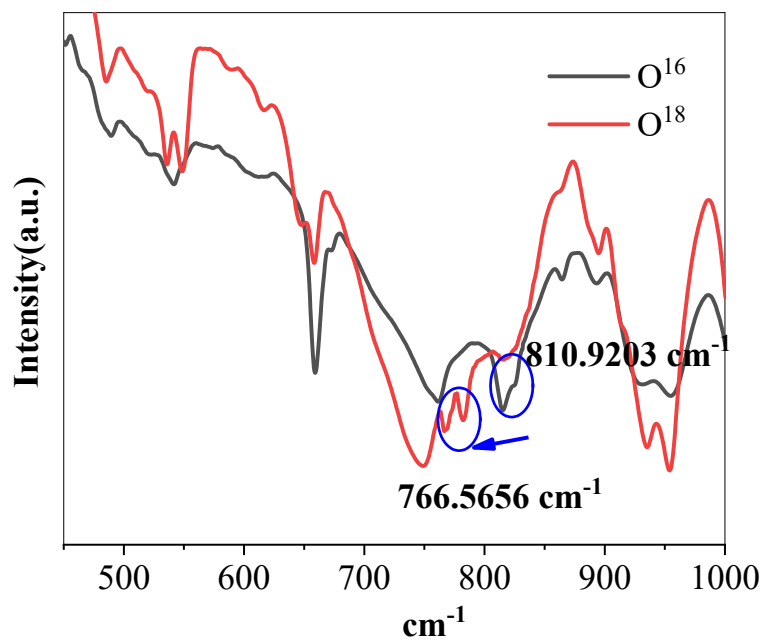

**Fig. S5.** Infrared spectra of the reaction solution of [Co(L)(Cl)<sub>2</sub>]Cl **1** (0.10 mM) generated upon constant potential electrolysis experiment with <sup>16</sup>O<sub>2</sub> or <sup>18</sup>O<sub>2</sub> in acetonitrile-water under at -0.2 V.

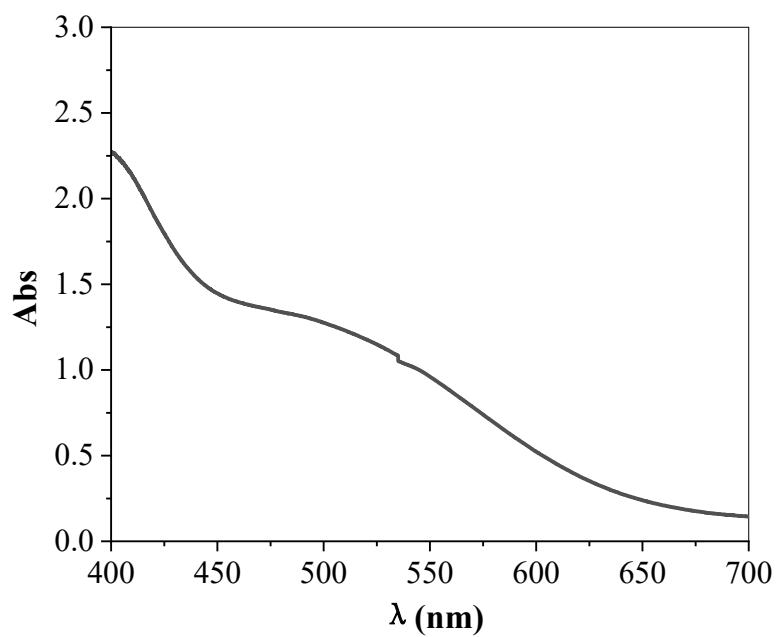

**Fig. S6.** UV-vis absorption spectrum of complex **1** (0.02 mM) in acetonitrile under -0.20 V with  $\text{H}^+$  (1.0 mM) at room temperature.

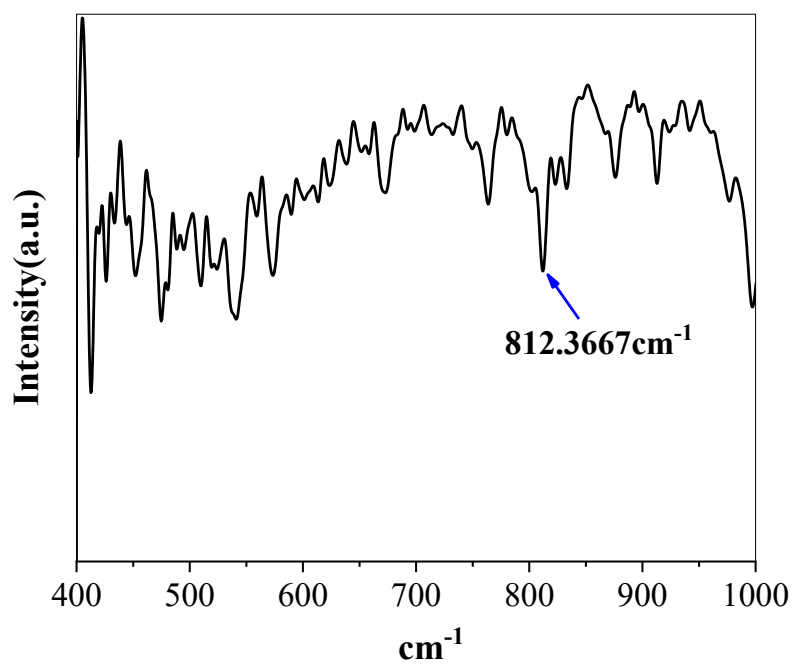

**Fig. S7.** Infrared spectrum of  $[\text{Co}(\text{L})(\mu\text{-OH})(\mu\text{-OO})\text{Co}(\text{L})]\text{Cl}_3$  **2**.

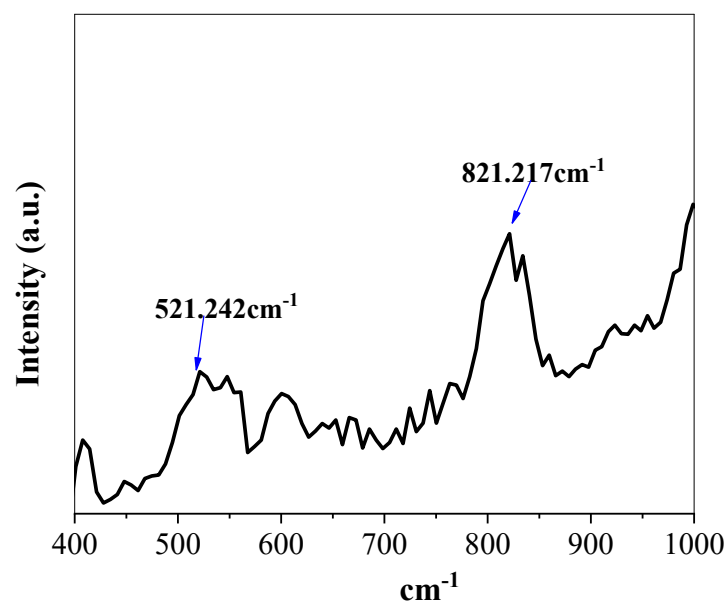

**Fig. S8.** Raman spectrum of  $[\text{Co}(\text{L})(\mu\text{-OH})(\mu\text{-OO})\text{Co}(\text{L})]\text{Cl}_3$  **2**.

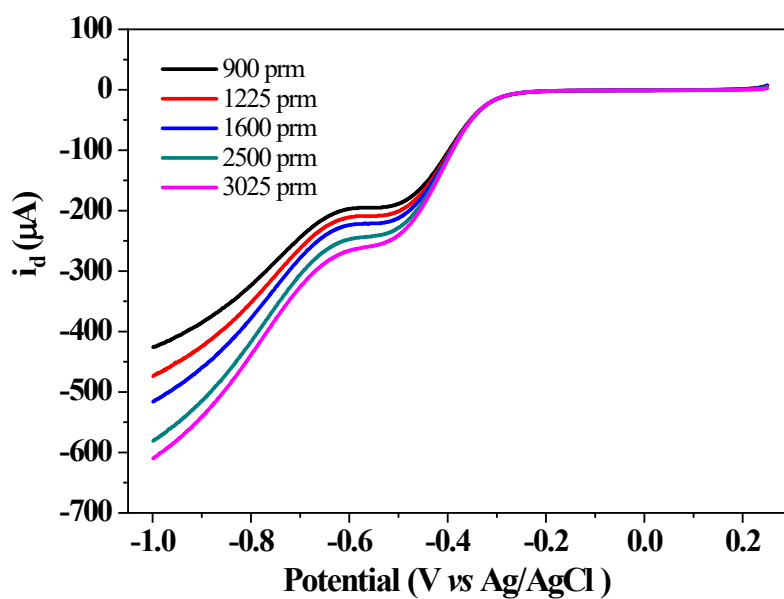

**Fig. S9.** Rotating ring-disk electrode (RRDE) measurement for  $\text{O}_2$  reduction at the glassy carbon (GC) disk electrode loaded with  $[\text{Co}(\text{L})(\text{Cl})_2]\text{Cl}$  **1** in an  $\text{O}_2$ -saturated 0.1 M KOH solution at various rotation rates. Conditions: work electrode, GC disk electrode; counter electrode, Pt ring electrode, 25 °C.



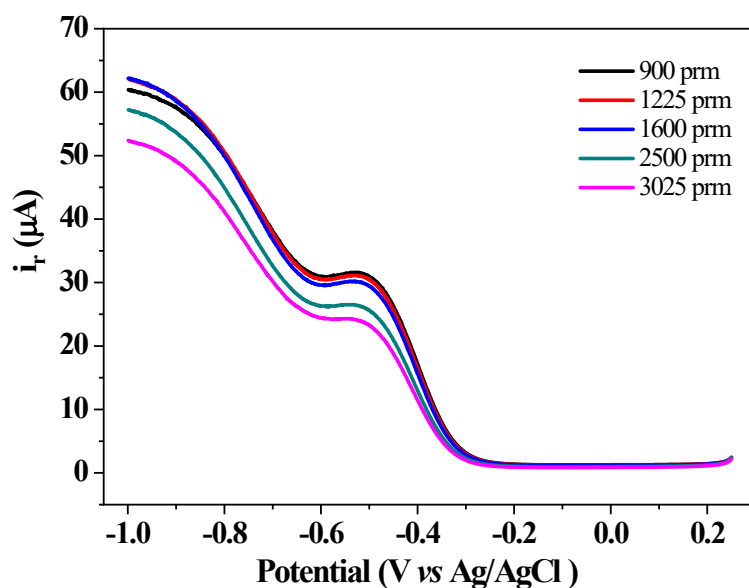

**Fig. S10.** RRDE measurement for  $\text{O}_2$  reduction of the ring current loaded with  $[\text{Co}(\text{L})(\text{Cl})_2]\text{Cl}$  **1** in an  $\text{O}_2$ -saturated 0.1 M KOH solution at various rotation rates. Conditions: work electrode, GC disk electrode; counter electrode, Pt ring electrode, 25 °C.

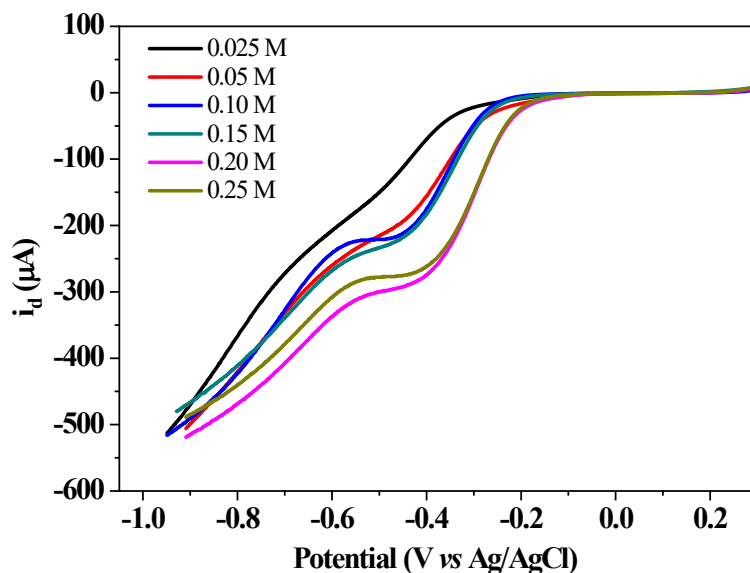

**Fig. S11.** RRDE measurement for  $\text{O}_2$  reduction at the GC disk electrode loaded with  $[\text{Co}(\text{L})(\text{Cl})_2]\text{Cl}$  **1** in an  $\text{O}_2$ -saturated with 1600 rpm at various KOH concentrations. Conditions: work electrode, GC disk electrode; counter electrode, Pt ring electrode, 25 °C.

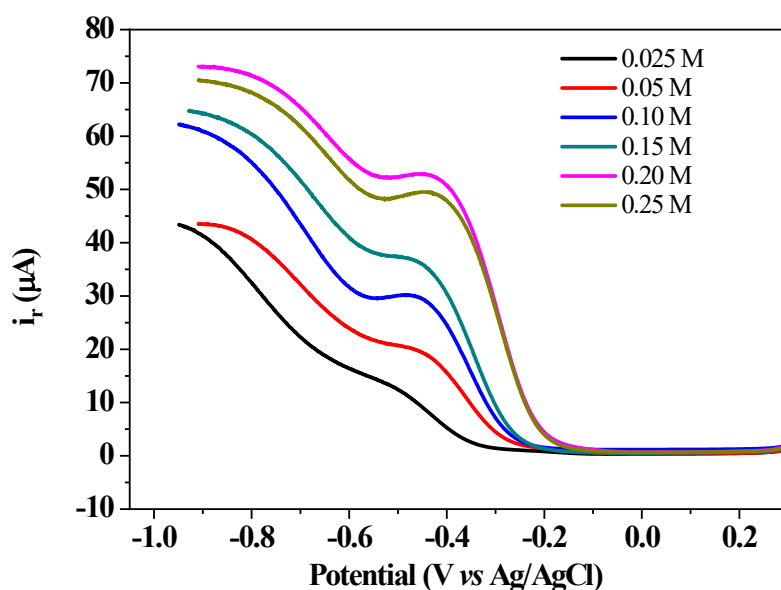

**Fig. S12.** RRDE measurement for  $\text{O}_2$  reduction of the ring current loaded with  $[\text{Co}(\text{L})(\text{Cl})_2]\text{Cl}$  **1** in an  $\text{O}_2$ -saturated with 1600 rpm at various KOH concentrations. Conditions: work electrode, GC disk electrode; counter electrode, Pt ring electrode, 25 °C.

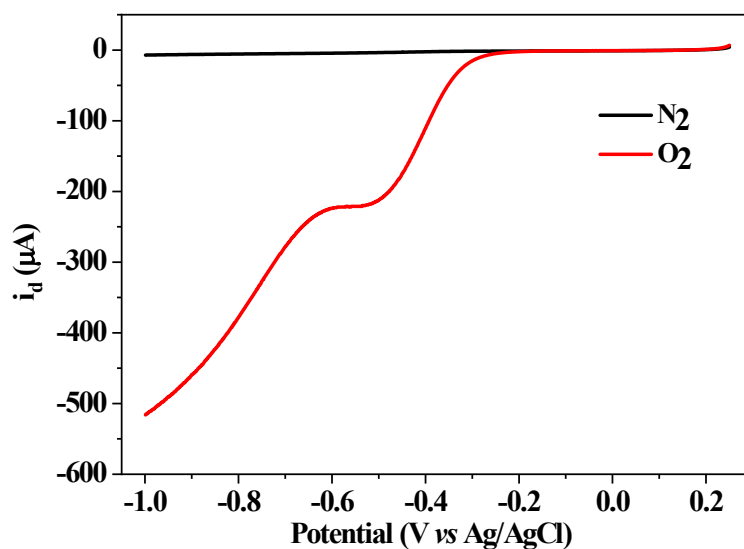

**Fig. S13.** RRDE measurement for  $\text{O}_2$  reduction at the GC disk electrode loaded with  $[\text{Co}(\text{L})(\text{Cl})_2]\text{Cl}$  **1** in a  $\text{N}_2$ -saturated and in an  $\text{O}_2$ -saturated 0.1 M KOH solution with 1600 rpm. Conditions: work electrode, GC disk electrode; counter electrode, Pt ring electrode, 25 °C.

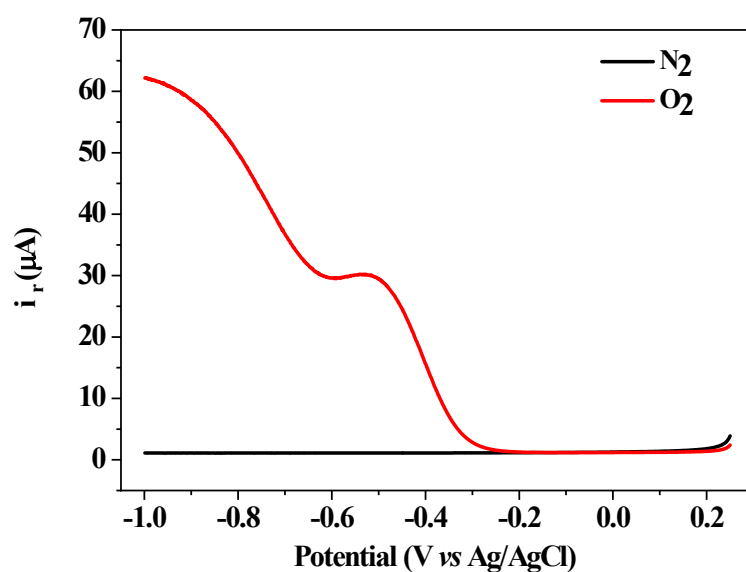

**Fig. S14.** RRDE measurement for O<sub>2</sub> reduction of the ring current loaded with [Co(L)(Cl)<sub>2</sub>]Cl **1** in a N<sub>2</sub>-saturated and in an O<sub>2</sub>-saturated 0.1 M KOH solution with 1600 rpm. Conditions: work electrode, GC disk electrode; counter electrode, Pt ring electrode, 25 °C.

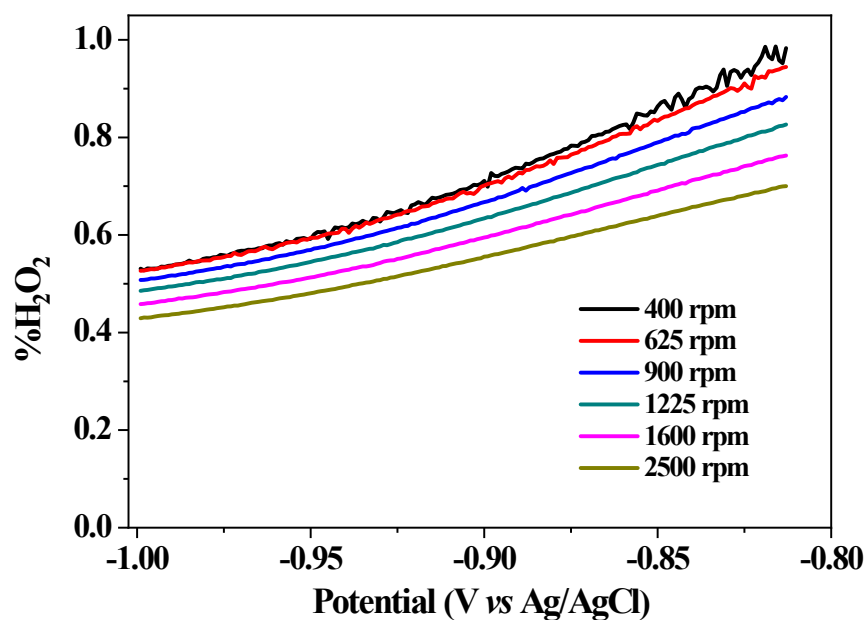

**Fig. S15.** The selectivity (%H<sub>2</sub>O<sub>2</sub>) as a function of the disk potential with varying rotation rates, in 0.1 M KOH solution.

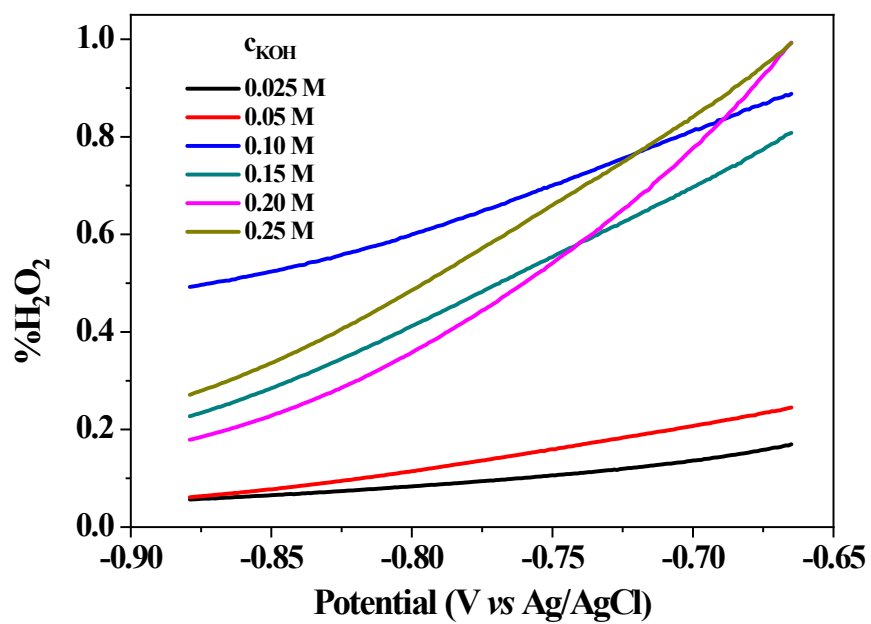

**Fig. S16.** The selectivity (%H<sub>2</sub>O<sub>2</sub>) as a function of the disk potential with different KOH concentrations at 1600 rpm.
